# Supplementary material
Source: Springer Nature journal article supplement (https://www.springermedizin.de/resource/supplementary/12885_2007_1060_MOESM6_ESM.pdf/9471004)

**A**

SD, n = 12      

 KD, n = 12

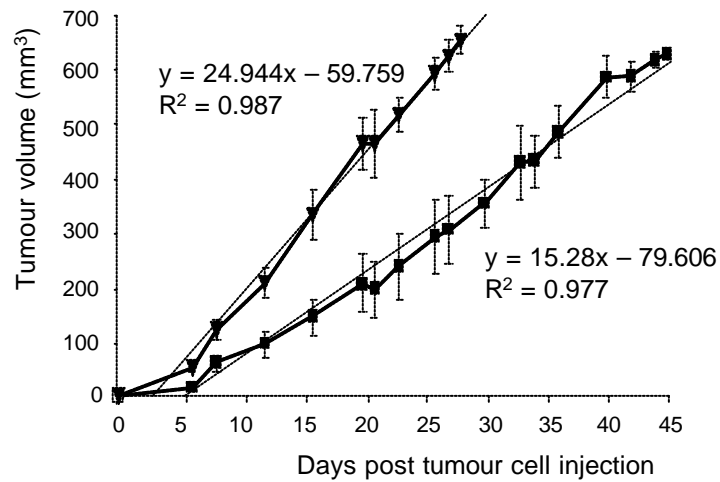**B**

KD group (n=12)

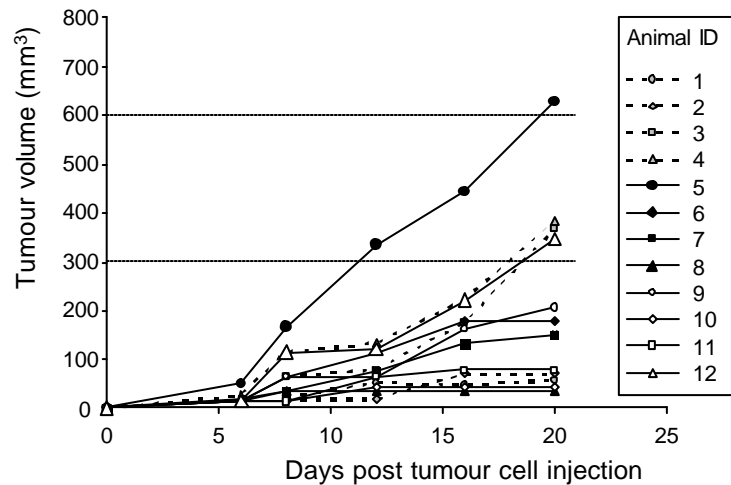**C**

SD group (n=12)

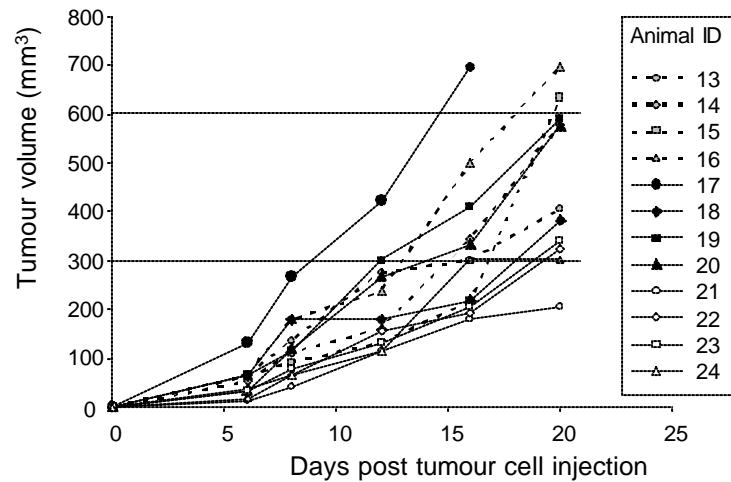

Supplement: MOESM6 [file 9471004]
